# Supplementary material
Source: PubMed Central journal article supplement (PMC8260469)

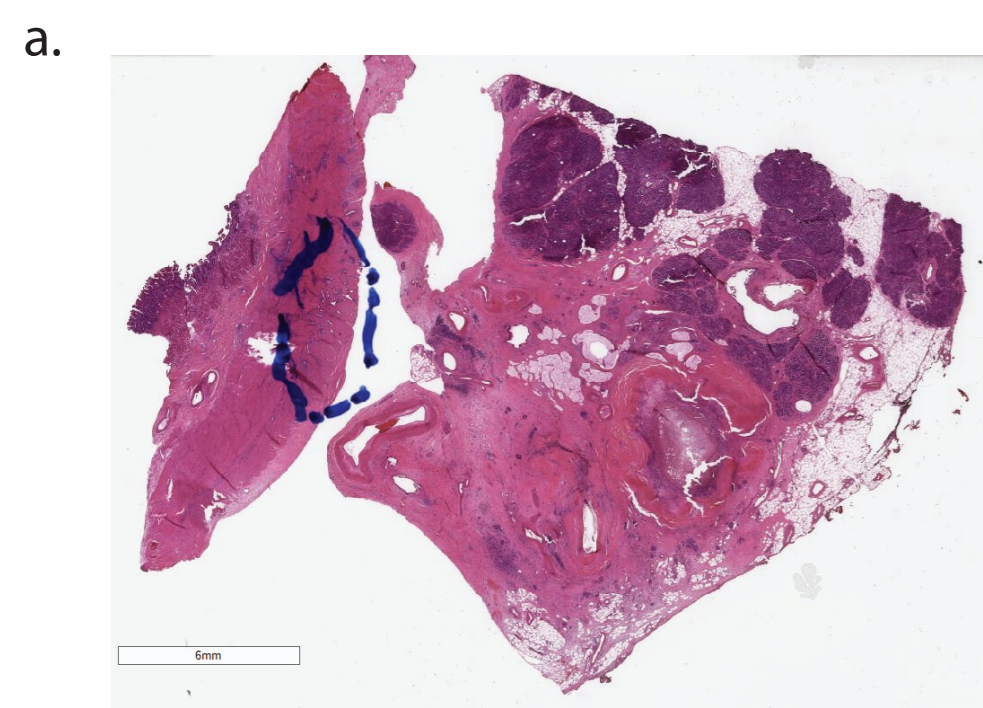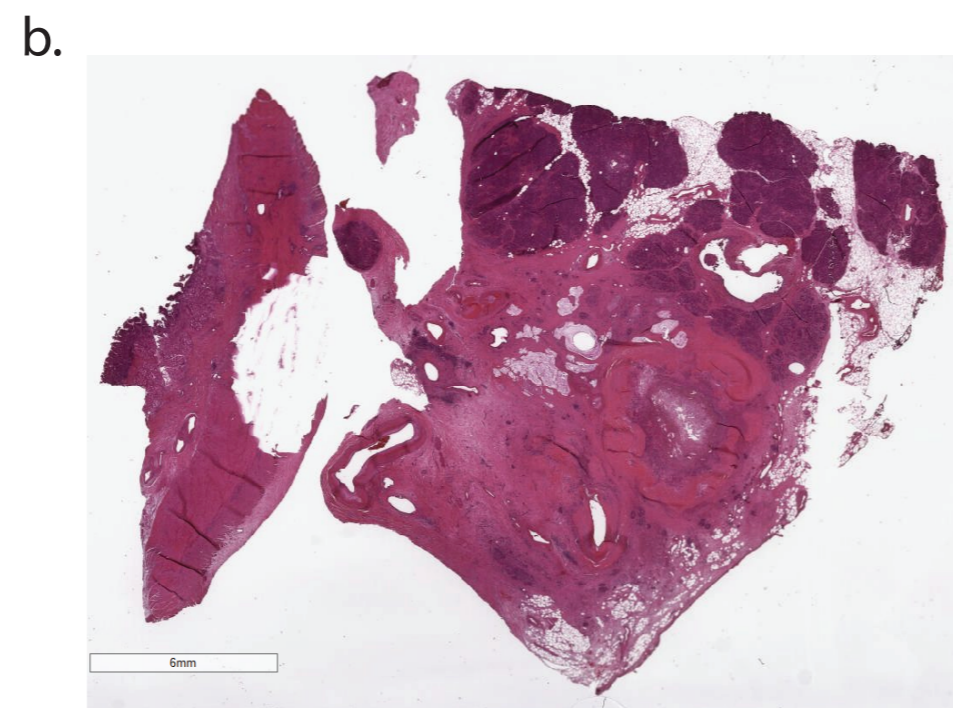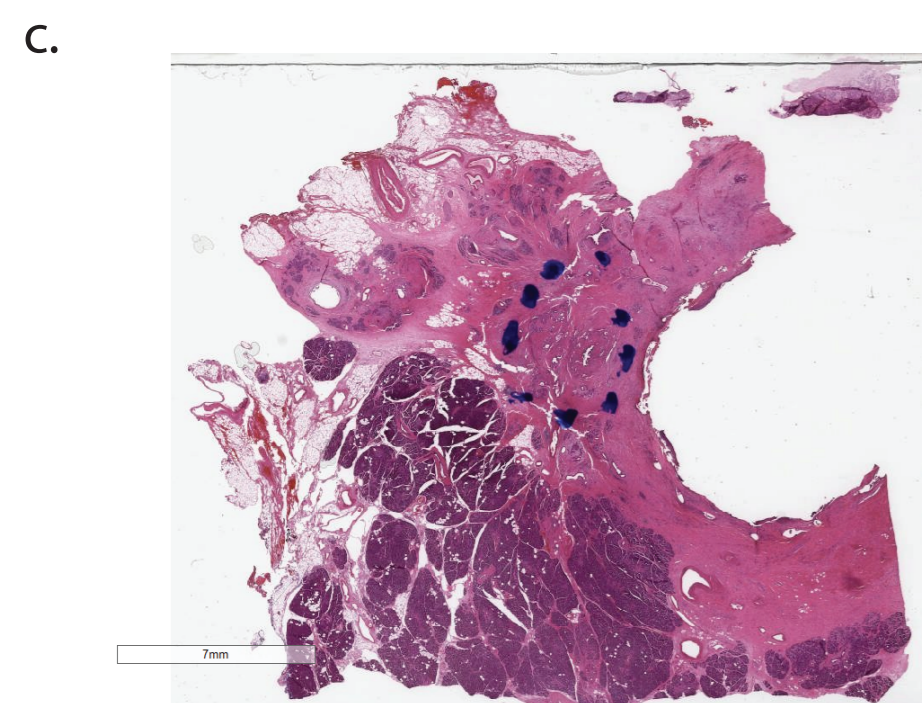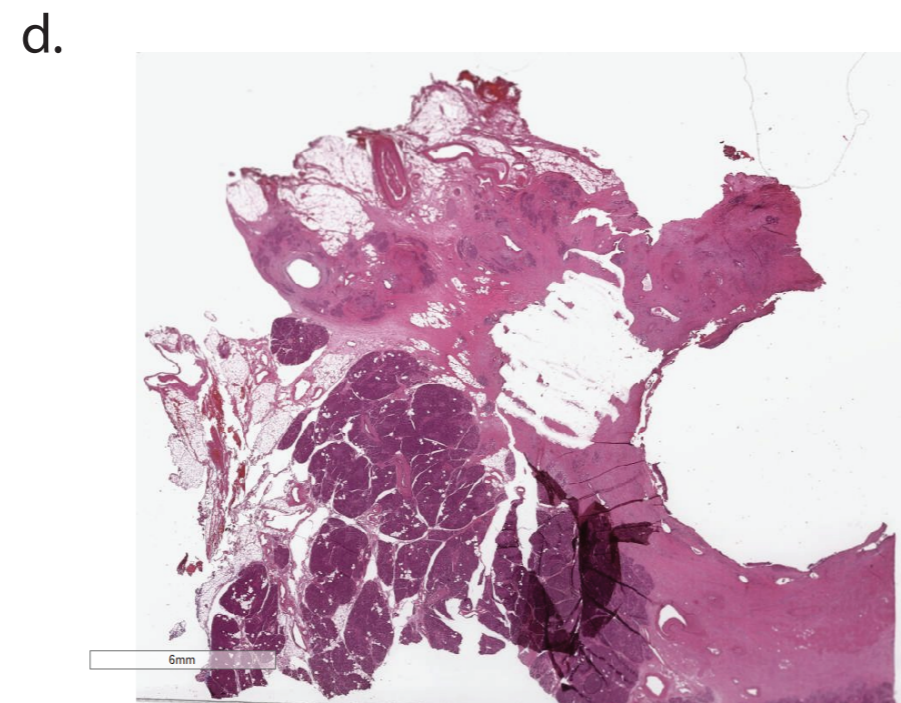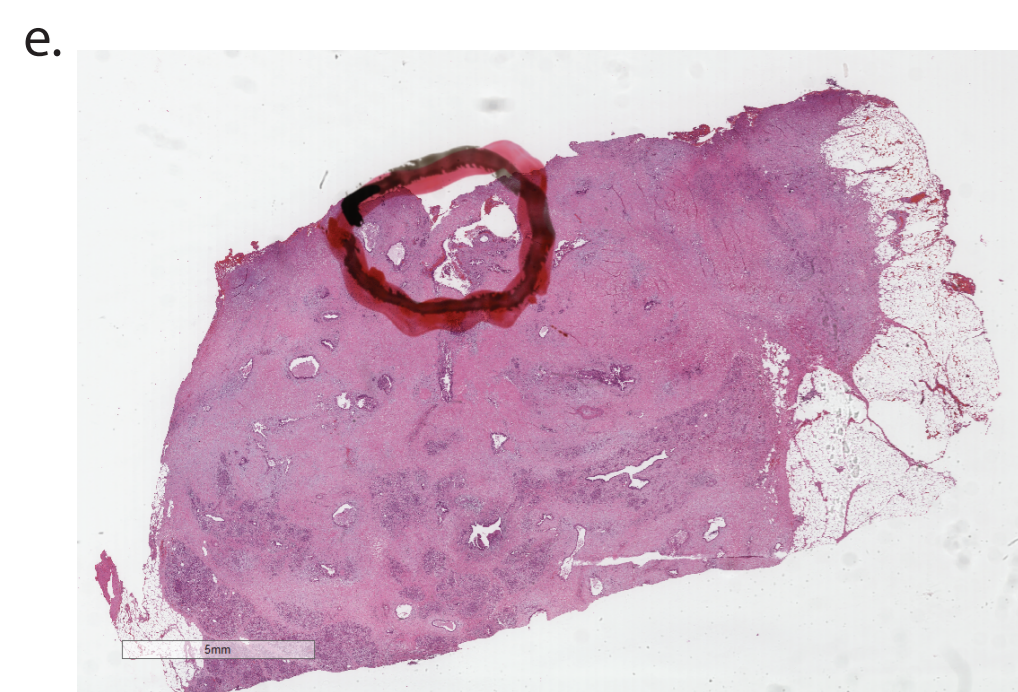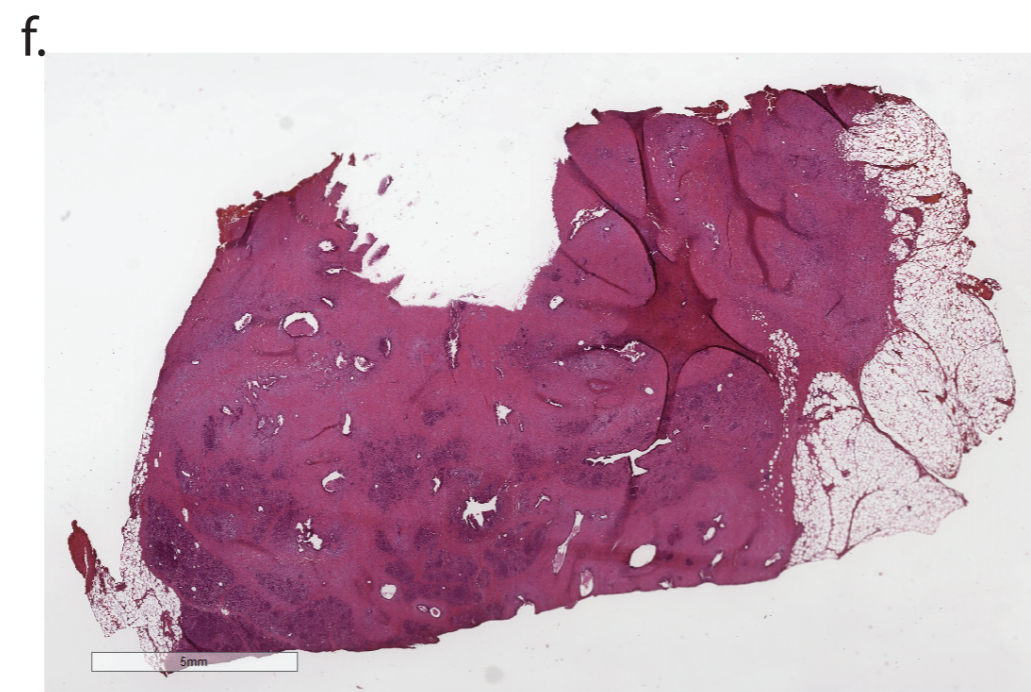

g.

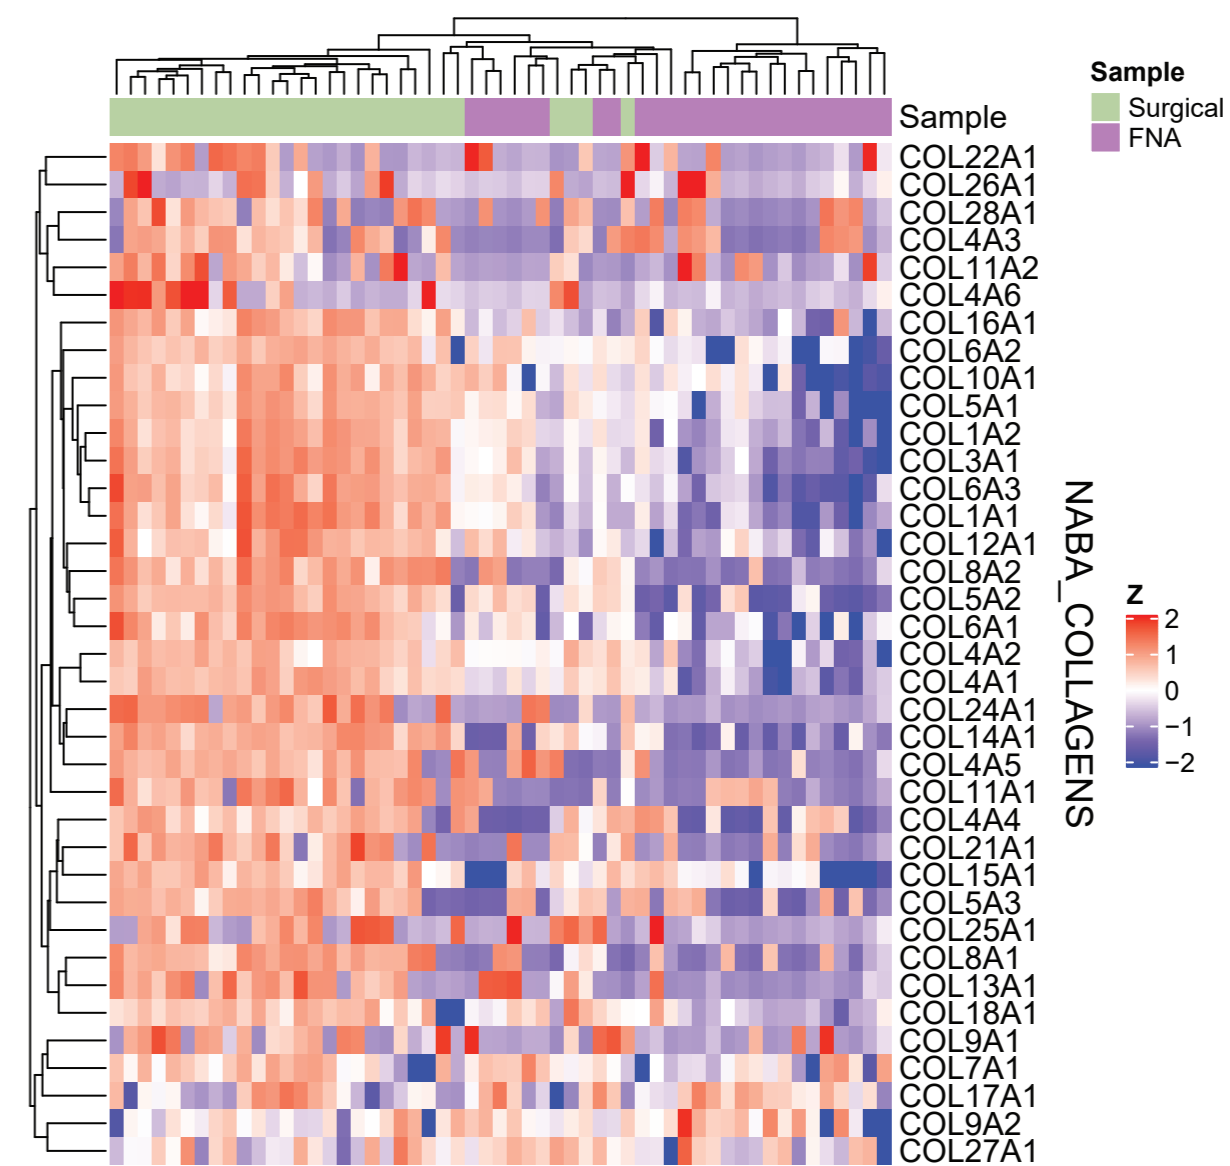

h.

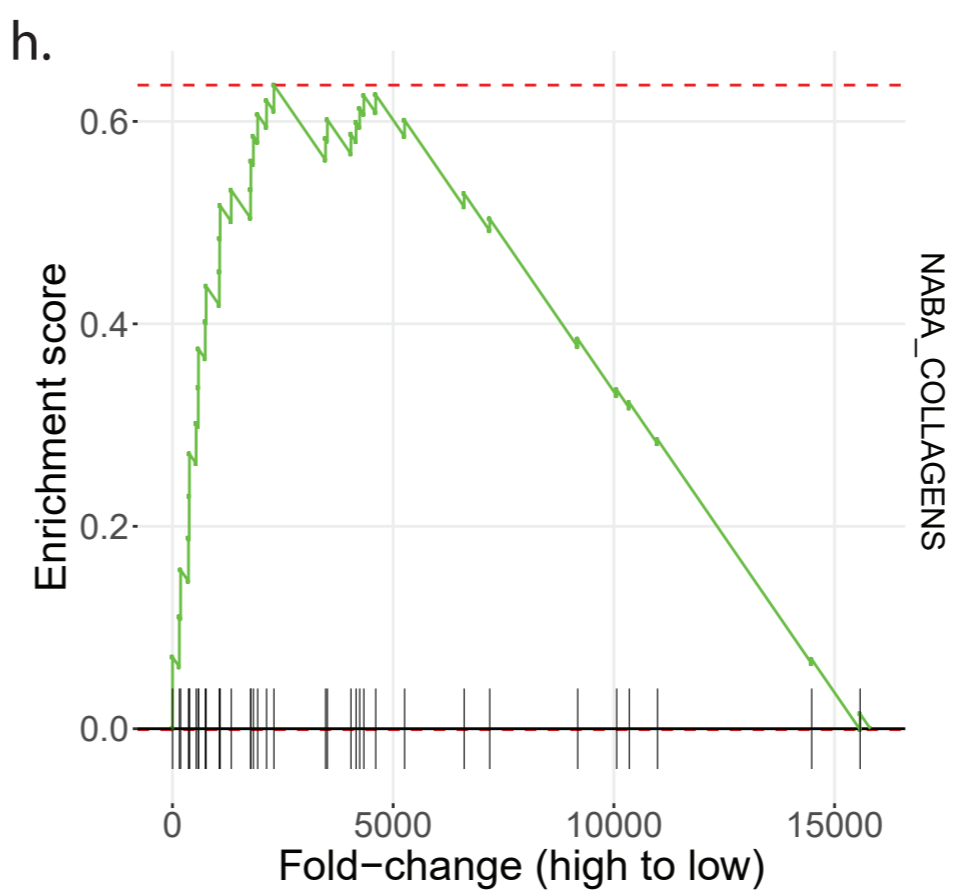

i.

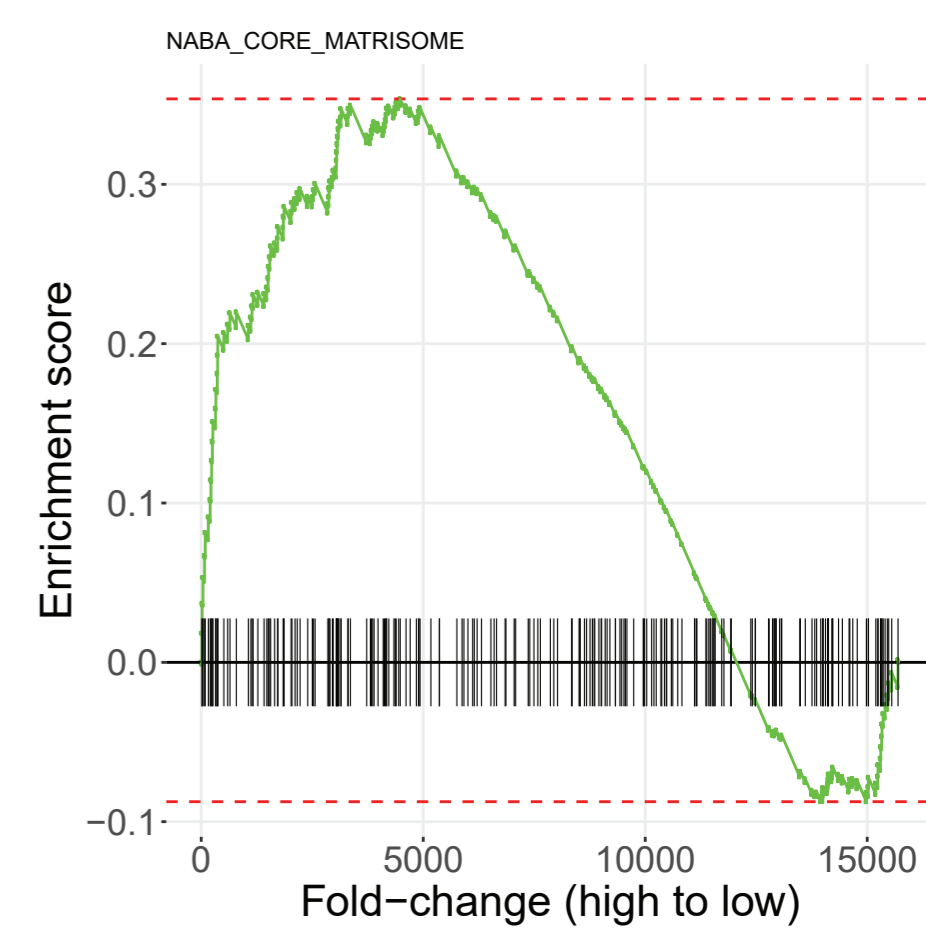

j.

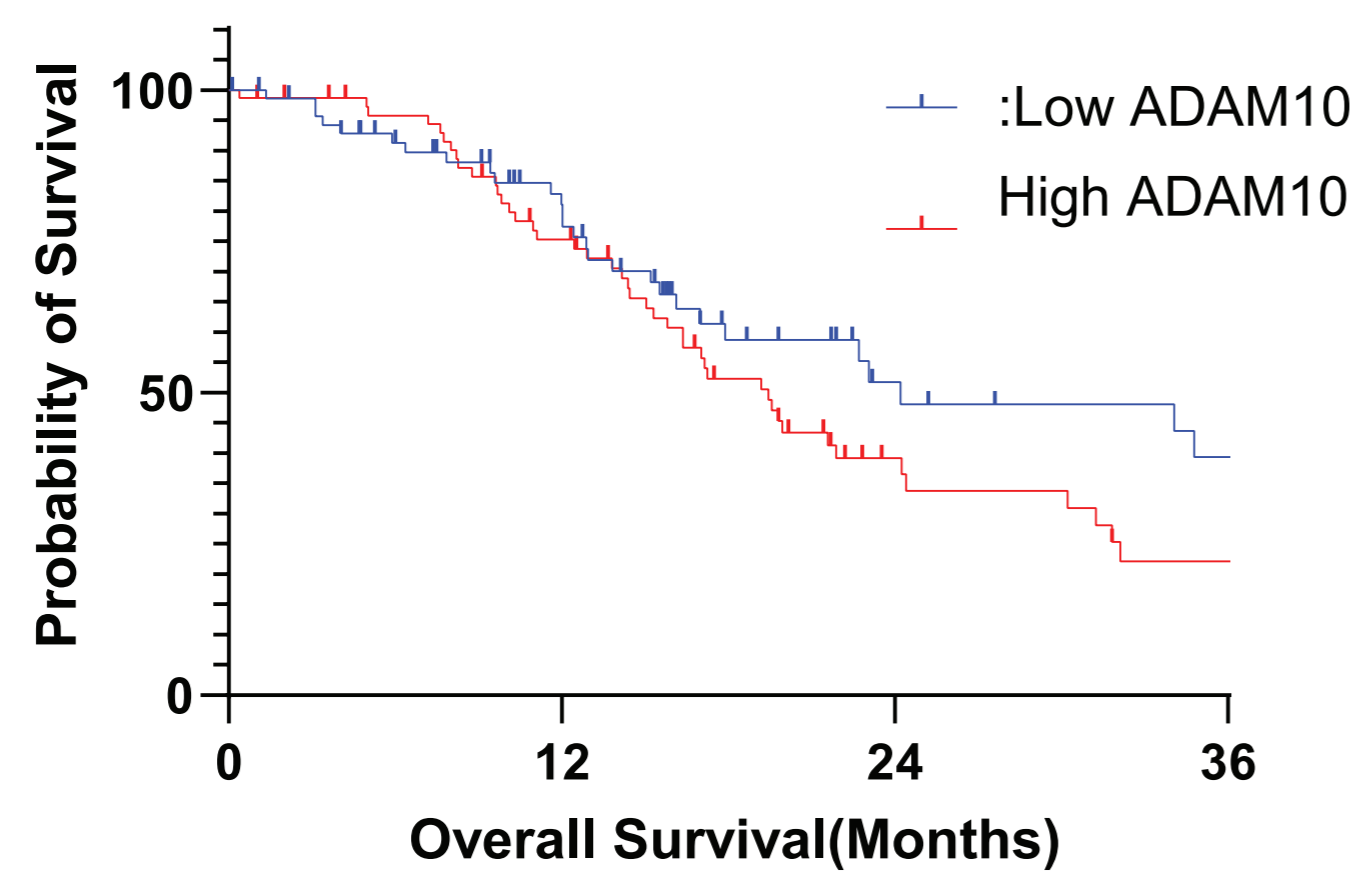

k.

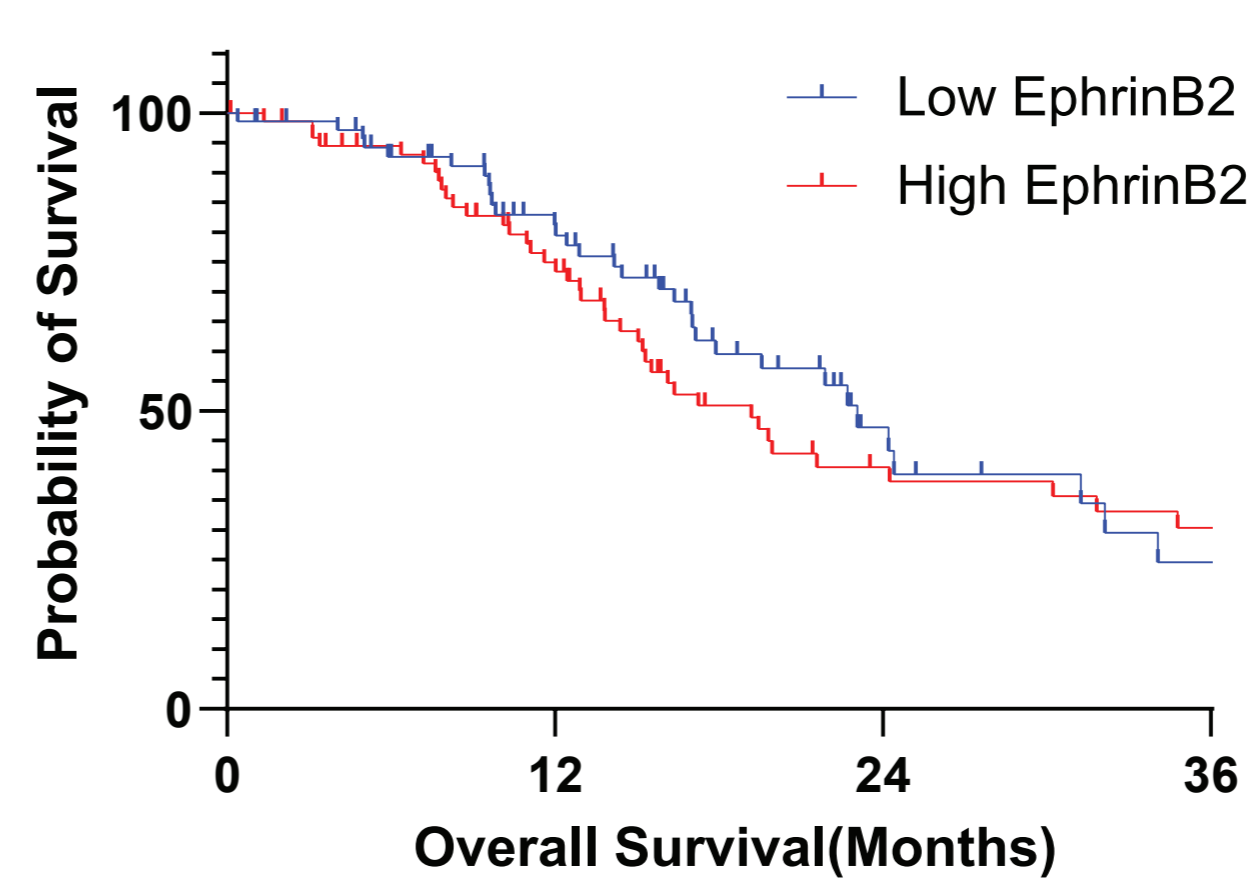

Supplement: NIHMS1670703-supplement-1.pdf [file NIHMS1670703-supplement-1.pdf]

Supplemental Figure 3.

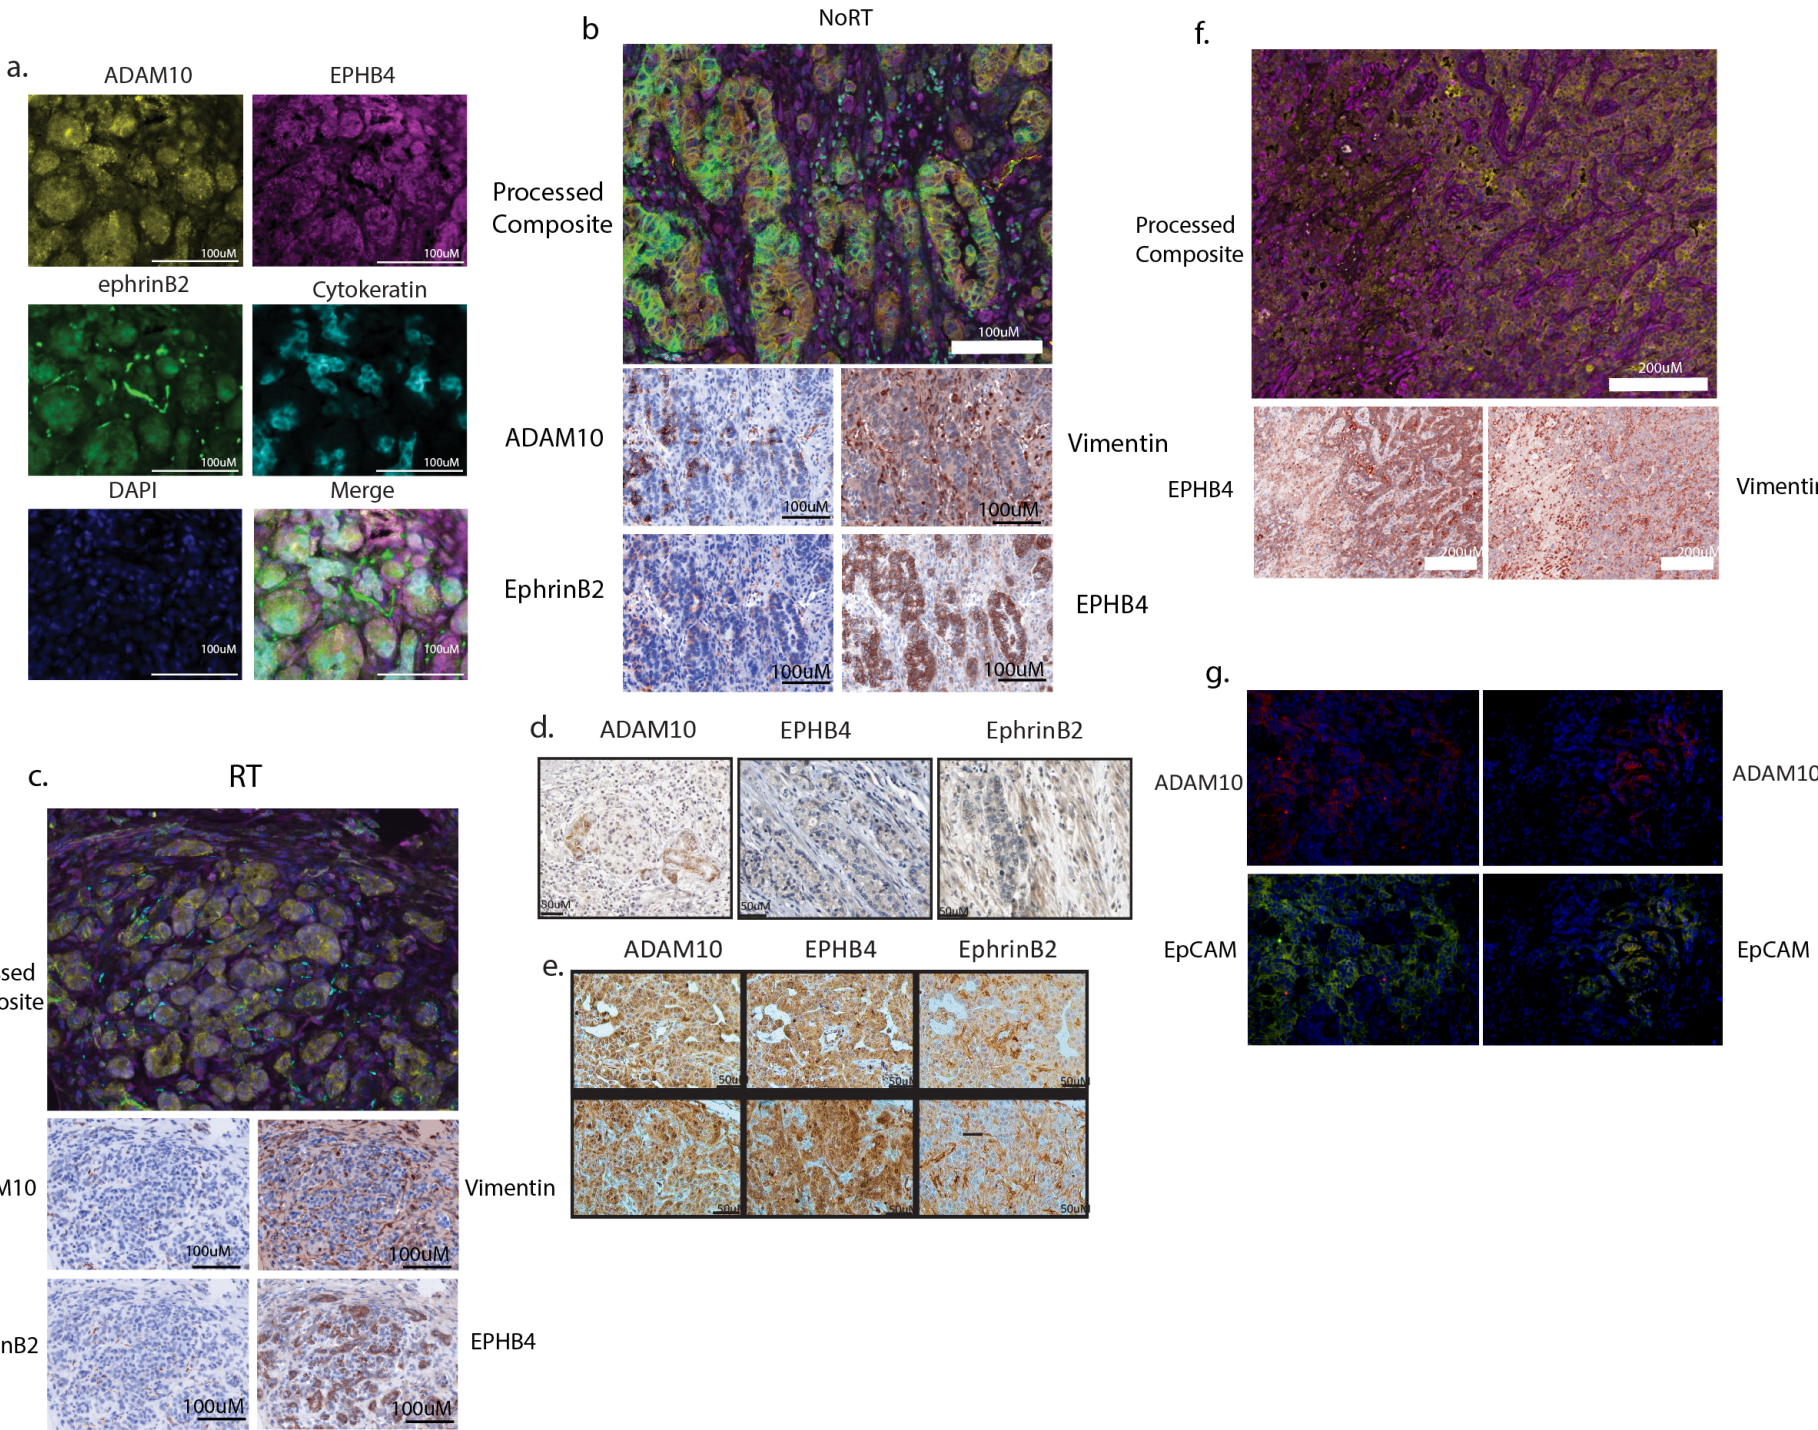

Supplement: NIHMS1670703-supplement-3.pdf [file NIHMS1670703-supplement-3.pdf]

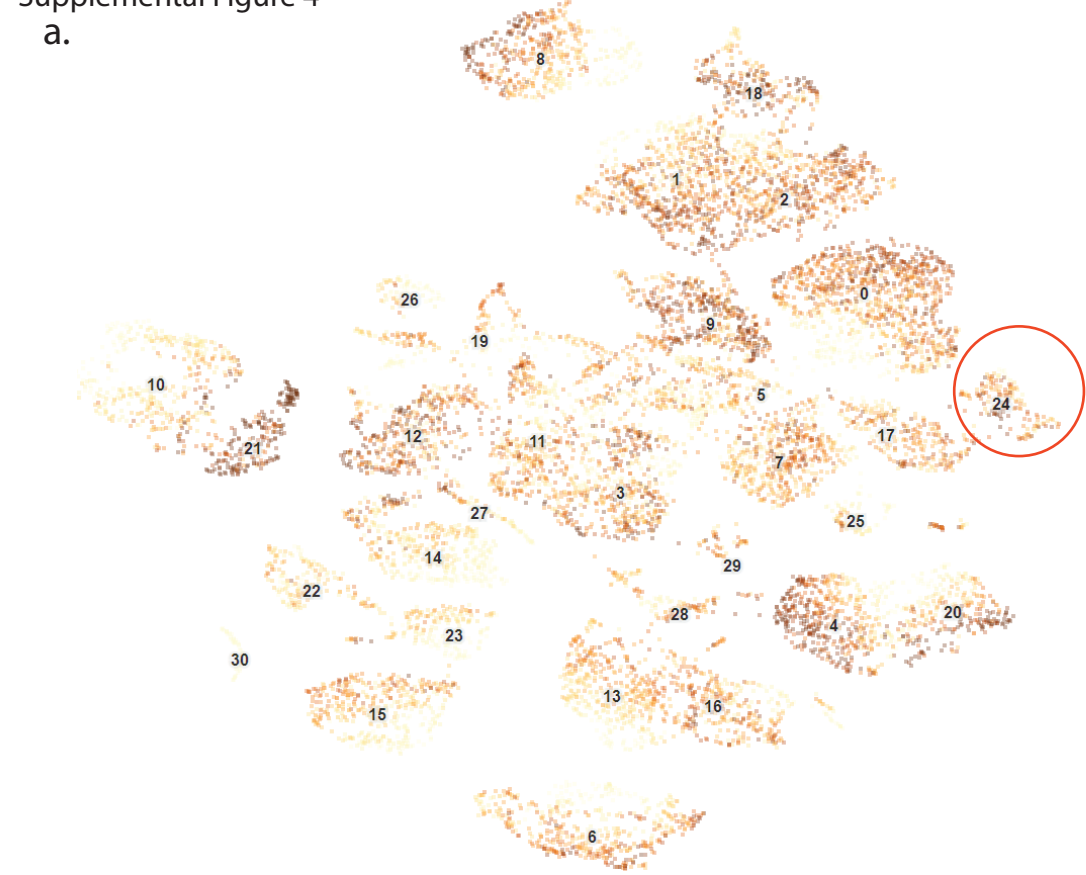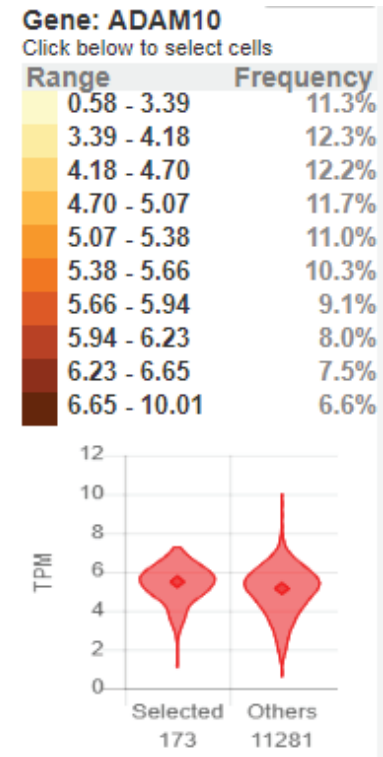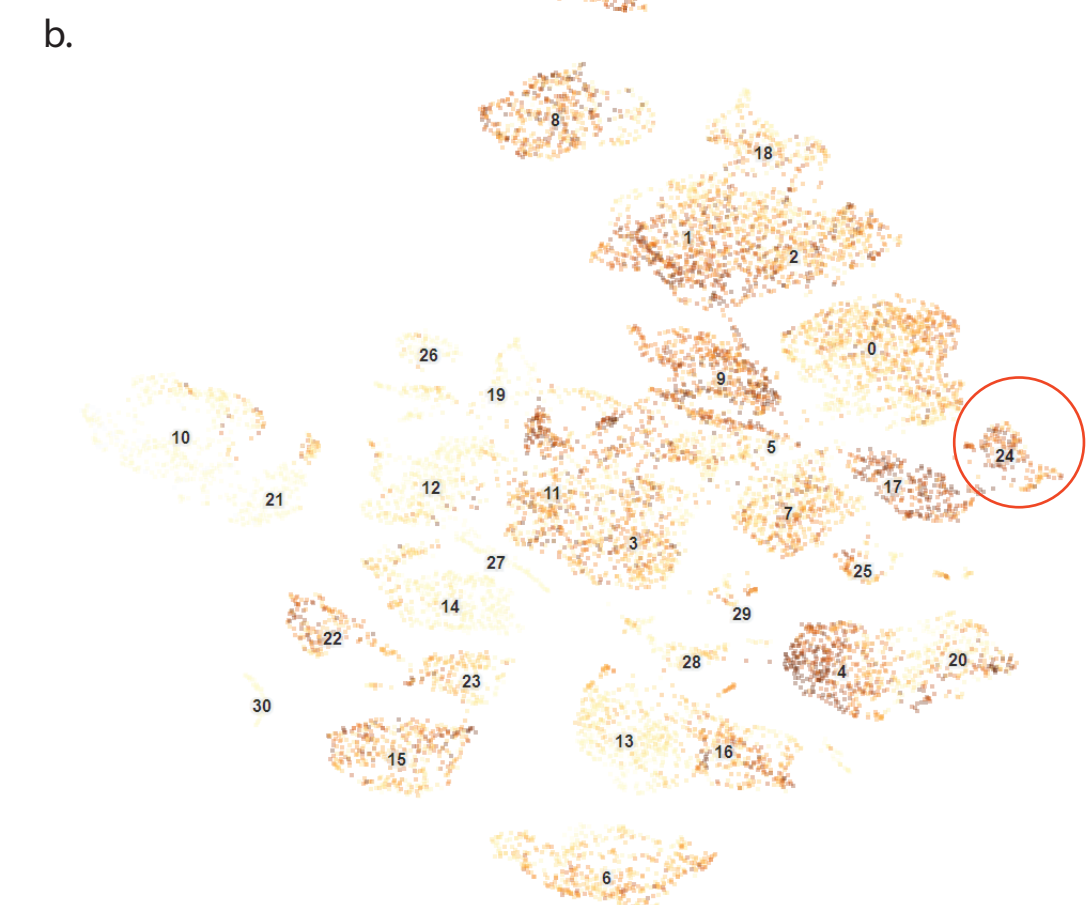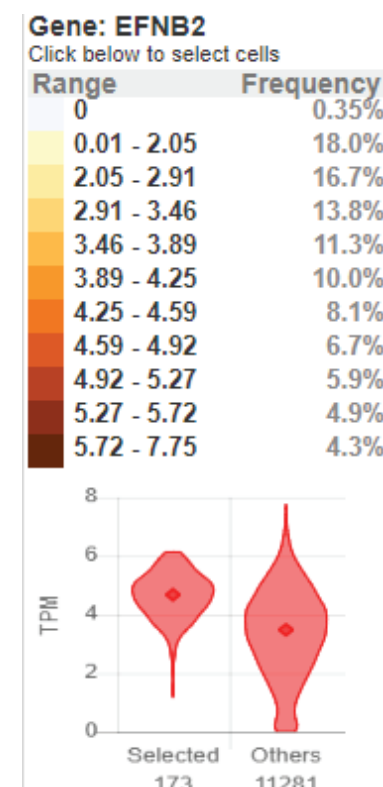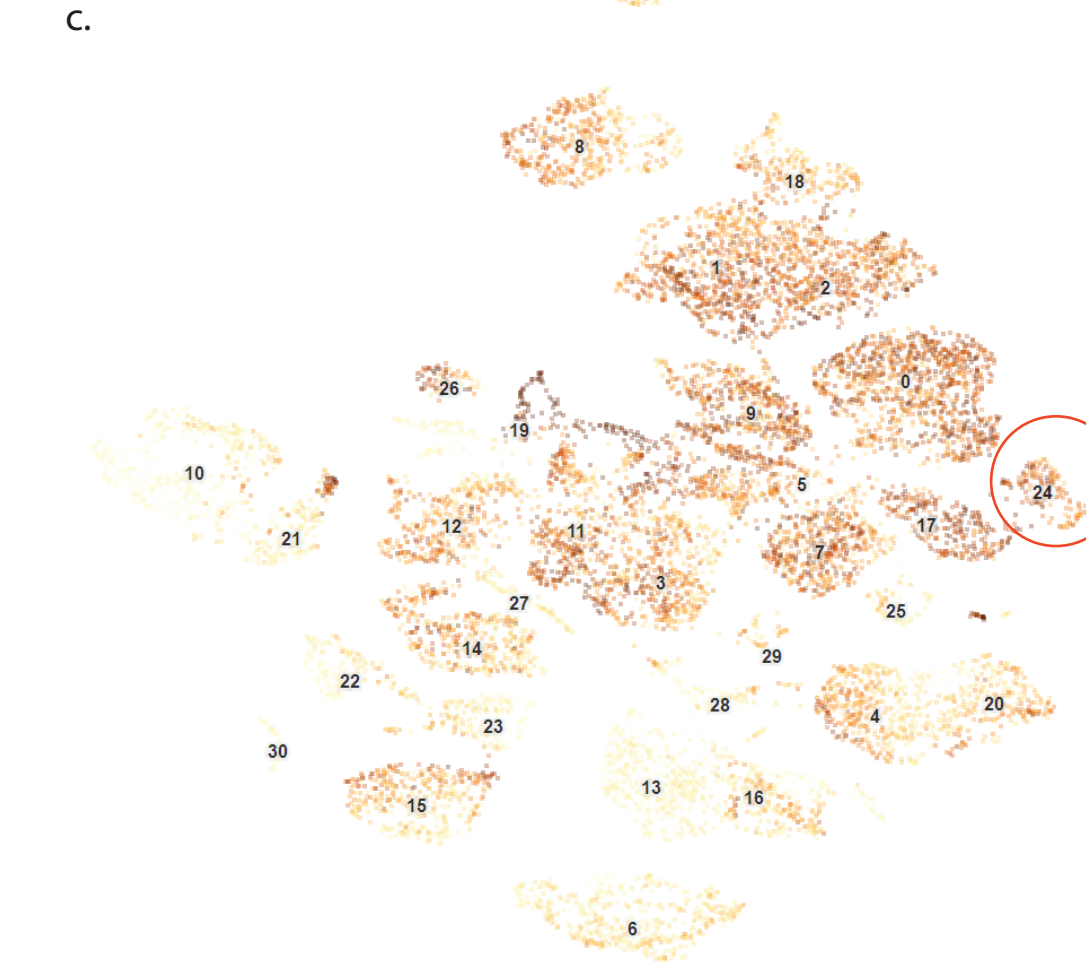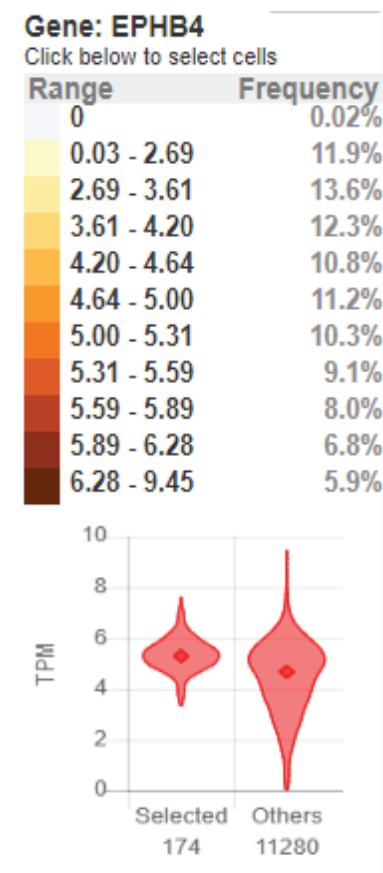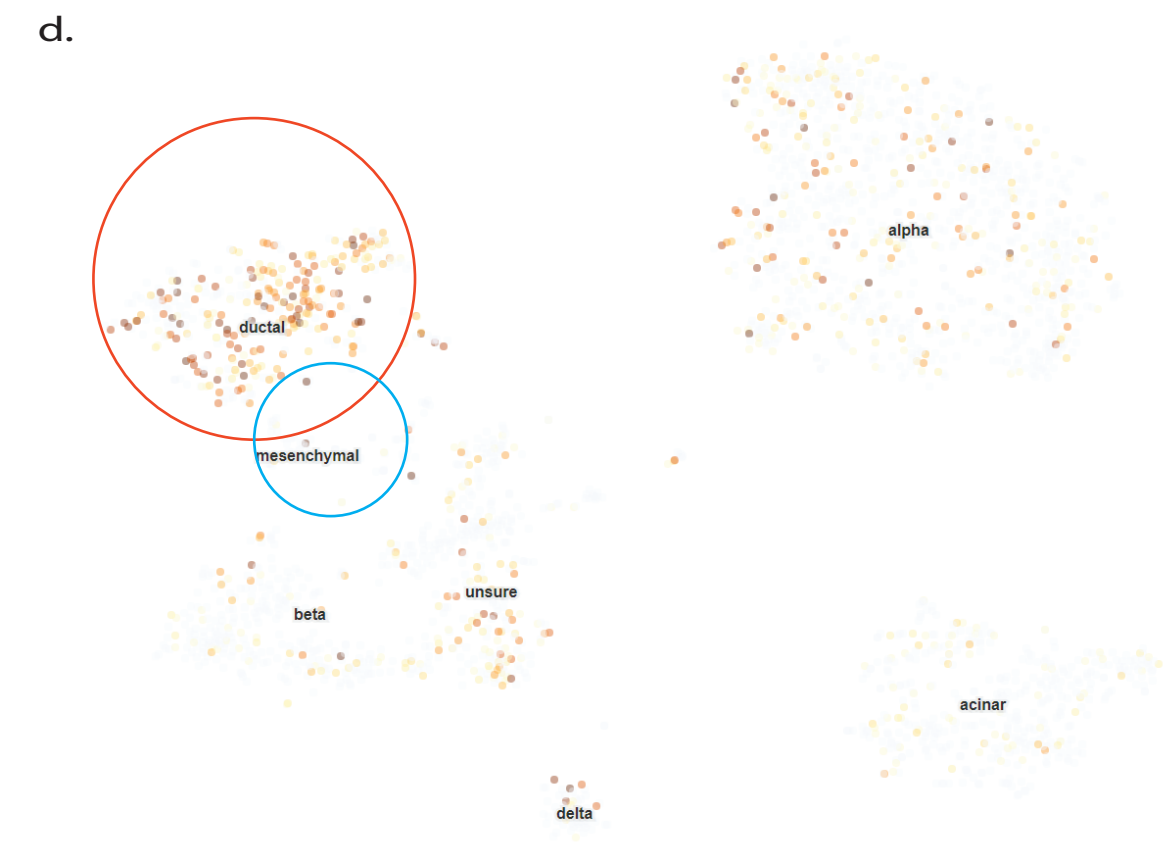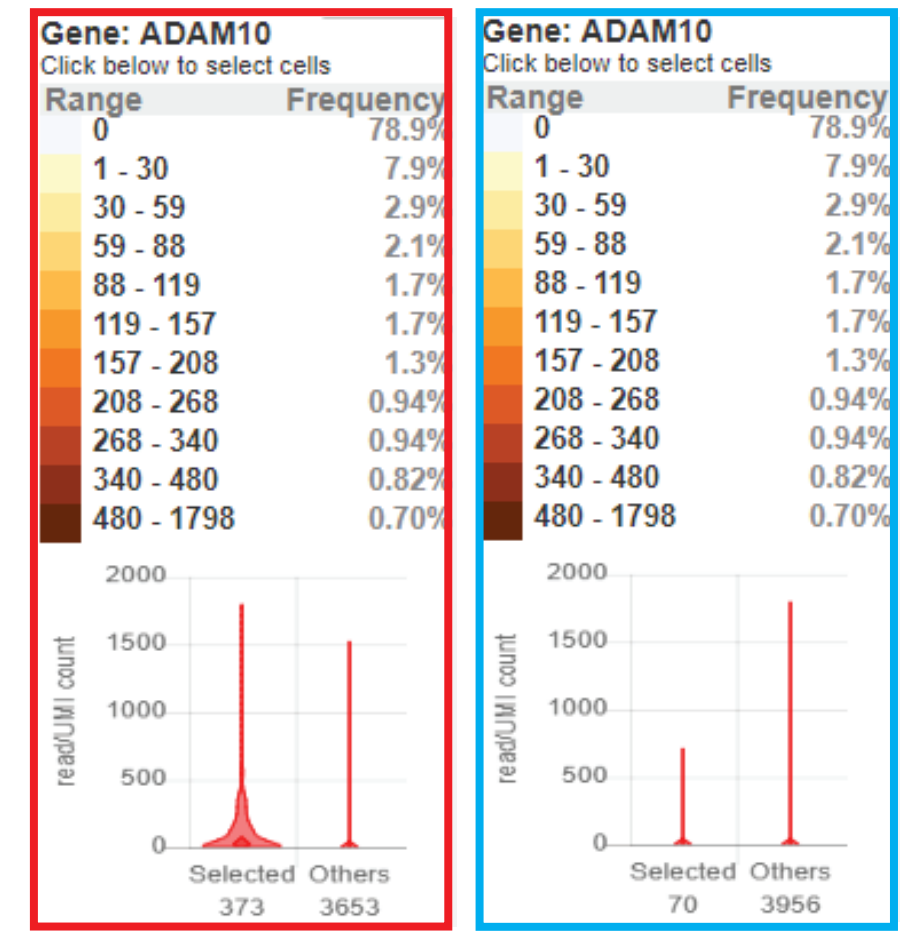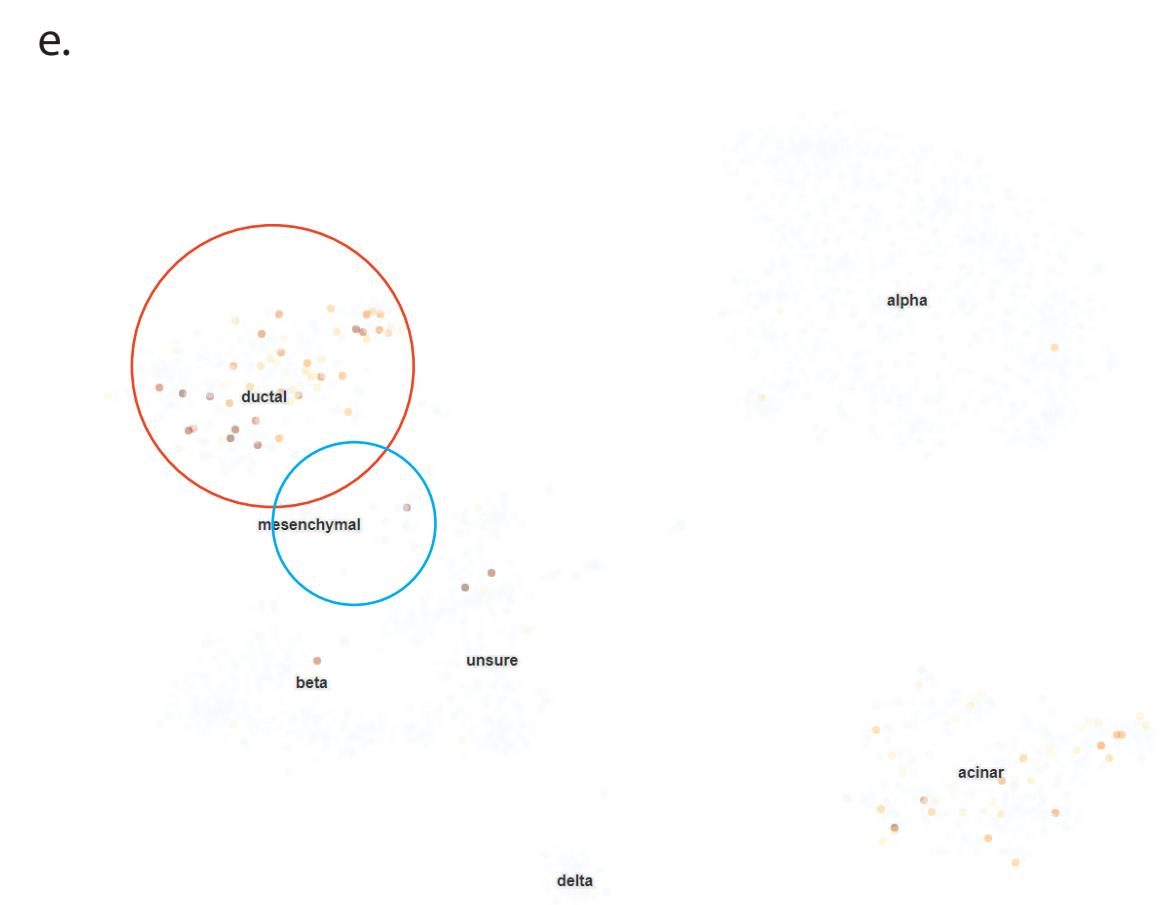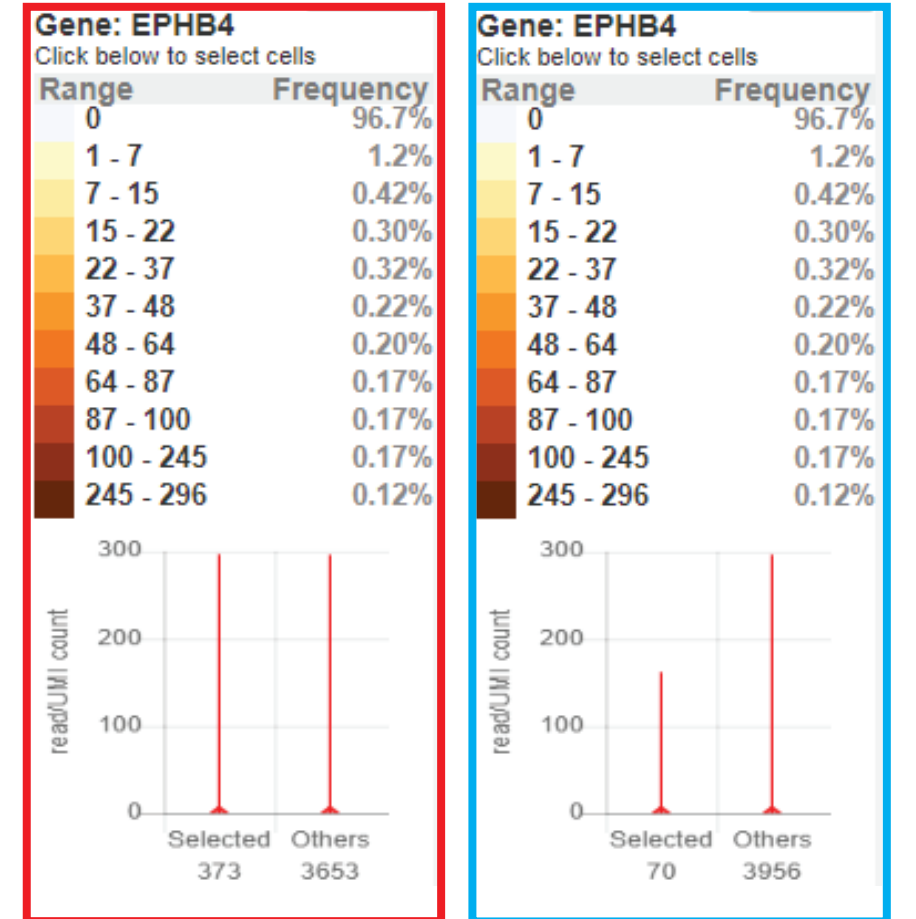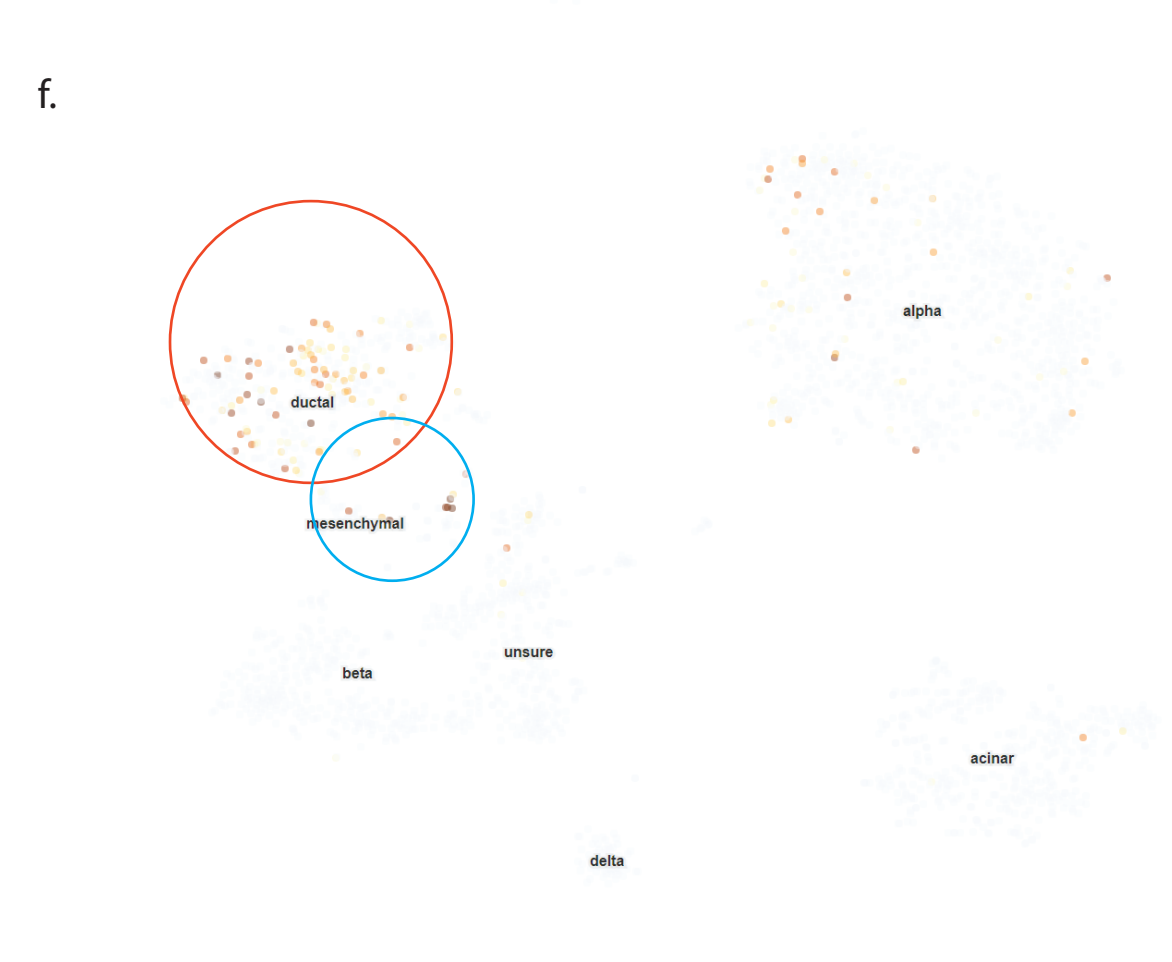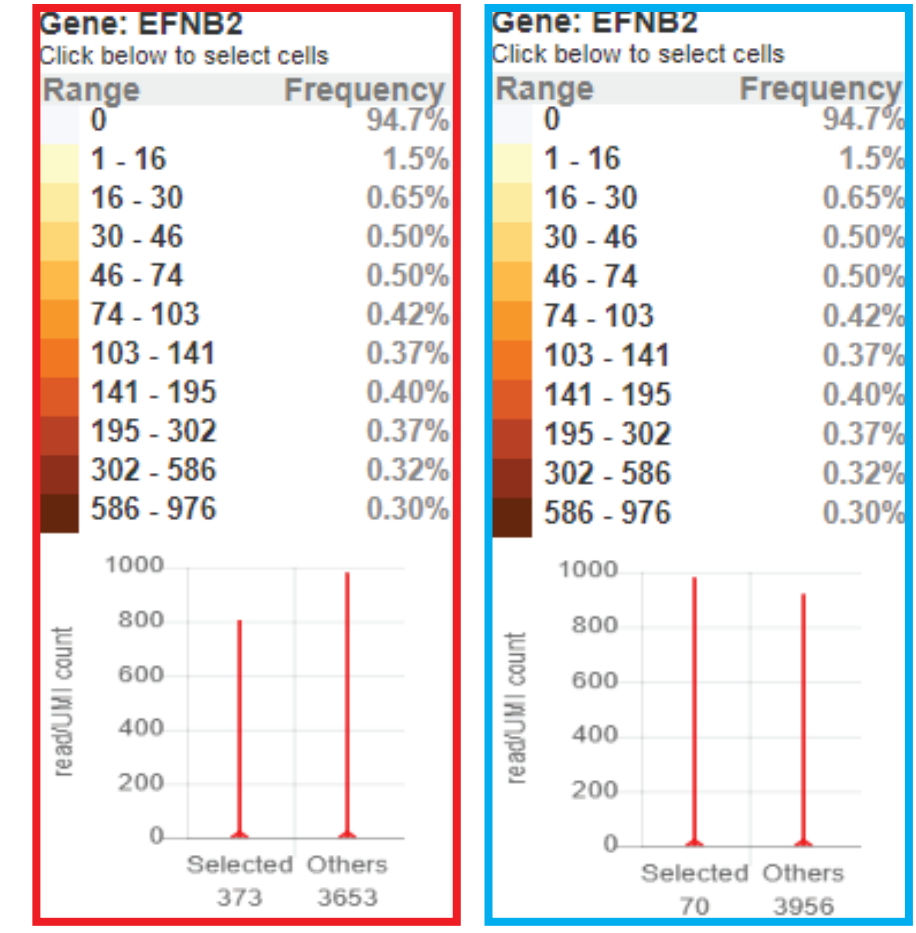

Supplement: NIHMS1670703-supplement-4.pdf [file NIHMS1670703-supplement-4.pdf]
